# Supplementary material for: Temperature and the vertical movements of oceanic whitetip sharks, Carcharhinus longimanus
Source: PubMed Central journal article supplement (PMC5974137; doi:10.1038/s41598-018-26485-3), 2018-05-29

## **Supplementary Information**

### **Temperature and the vertical movements of oceanic whitetip sharks, *Carcharhinus longimanus***

**Samantha Andrzejczek<sup>1,2\*</sup>, Adrian C. Gleiss<sup>3</sup>, Lance K. B. Jordan<sup>4</sup>, Charitha B. Pattiaratchi<sup>1</sup>, Lucy A. Howey<sup>4</sup>, Edward J. Brooks<sup>5</sup> and Mark G. Meekan<sup>2</sup>**

<sup>1</sup>School of Civil, Environmental and Mining Engineering & The UWA Oceans Institute, The University of Western Australia, Crawley, WA, 6009, Australia

<sup>2</sup>The Australian Institute of Marine Science, Crawley WA, 6009, Australia

<sup>3</sup>Centre for Fish and Fisheries Research, Murdoch University, Murdoch, WA, 6150, Australia

<sup>4</sup>Microwave Telemetry, Inc., Columbia, Maryland, 21045, USA

<sup>5</sup>Cape Eleuthera Institute, The Bahamas

\*[sandrzejczek@gmail.com](mailto:sandrzejczek@gmail.com)

Table S1. Summary of tagging information and biological information of the tagged individuals.

| Shark ID | Deployment date | Days at liberty | Fork length (cm) | Sex | Pop-off latitude (°N) | Pop-off longitude (°S) | Mean ( $\pm$ SD) depth (m) | Mean ( $\pm$ SD) temperature (°C) | Maximum depth (m) | Minimum temperature (°C) |
|----------|-----------------|-----------------|------------------|-----|-----------------------|------------------------|----------------------------|-----------------------------------|-------------------|--------------------------|
| OWT1     | 5/1/2011        | 184             | 218              | F   | 22.89                 | 74.68                  | 59.92 $\pm$ 45.02          | 26.35 $\pm$ 1.68                  | 1081.9            | 7.75                     |
| OWT2     | 5/4/2011        | 153             | 189              | F   | 23.20                 | 74.91                  | 46.02 $\pm$ 38.52          | 26.16 $\pm$ 1.87                  | 1008.7            | 8.54                     |
| OWT3     | 5/4/2011        | 245             | 214              | F   | 23.73                 | 74.93                  | 50.03 $\pm$ 37.29          | 26.59 $\pm$ 1.46                  | 751.8             | 10.89                    |
| OWT4     | 5/1/2011        | 153             | 233              | F   | 24.36                 | 75.37                  | 41.66 $\pm$ 37.42          | 25.98 $\pm$ 1.66                  | 720.2             | 7.90                     |
| OWT5     | 5/7/2012        | 245             | 212              | F   | 24.60                 | 75.50                  | 43.32 $\pm$ 33.9           | 26.18 $\pm$ 1.56                  | 577.3             | 13.53                    |
| OWT6     | 5/7/2012        | 150             | 179              | F   | 22.69                 | 73.38                  | 50.8 $\pm$ 39.9            | 27.09 $\pm$ 1.65                  | 635.1             | 11.04                    |
| OWT7     | 5/11/2012       | 278             | 228              | F   | 23.94                 | 74.93                  | 45.37 $\pm$ 48.83          | 26.34 $\pm$ 1.74                  | 1190.2            | 7.43                     |
| OWT8     | 5/12/2012       | 335             | 212              | F   | 24.75                 | 75.52                  | 45.82 $\pm$ 40.55          | 25.29 $\pm$ 1.54                  | 1081.9            | 6.79                     |
| OWT9     | 5/12/2012       | 325             | 195              | M   | 24.01                 | 74.46                  | 57.65 $\pm$ 41.11          | 25.33 $\pm$ 1.56                  | 875.2             | 9.48                     |
| OWT10    | 5/9/2012        | 112             | 216              | F   | 24.22                 | 75.32                  | 74.94 $\pm$ 44.19          | 26.58 $\pm$ 1.70                  | 845.6             | 9.32                     |
| OWT11    | 5/10/2012       | 60              | 168              | F   | 24.67                 | 76.05                  | 37.28 $\pm$ 29.26          | 26.04 $\pm$ 1.26                  | 420.6             | 17.63                    |
| OWT12    | 5/9/2012        | 245             | 210              | F   | 21.77                 | 74.20                  | 48.64 $\pm$ 43.02          | 26.31 $\pm$ 1.65                  | 895.3             | 9.48                     |
| OWT13    | 5/8/2013        | 83              | 198              | M   | 23.11                 | 75.02                  | 42.04 $\pm$ 41.29          | 25.95 $\pm$ 1.32                  | 855.3             | 9.63                     |
| OWT14    | 5/9/2013        | 174             | 183              | F   | 25.30                 | 76.34                  | 46.63 $\pm$ 33.04          | 26.36 $\pm$ 1.56                  | 442.1             | 17.94                    |
| OWT15    | 5/12/2013       | 202             | 203              | F   | 24.63                 | 75.83                  | 45.04 $\pm$ 35.54          | 26.56 $\pm$ 1.53                  | 838.5             | 9.32                     |
| OWT16    | 5/8/2013        | 22              | 203              | F   | 24.83                 | 75.70                  | 39.42 $\pm$ 30.49          | 25.33 $\pm$ 0.94                  | 232.0             | 20.21                    |

Table S2. All models involved in the model selection process. Model comparisons were made using Akaike's Information Criterion (AIC), Bayesian Information Criterion (BIC) and conditional  $R^2$  and marginal  $R^2$  values.  $\Delta$ AIC displays deviance in AIC scores from top ranked models. All models are generalised linear mixed models and were ran using the nlme package in R with shark identity as a random variable. Proportion of time spent in the top 50 m (Prop50) was logit transformed prior to analysis. All null models include the random effect.

| Model                                  | DF          | AIC          | BIC          | $\Delta$ AIC | wAIC         | $R^2_c$     | $R^2_m$     |
|----------------------------------------|-------------|--------------|--------------|--------------|--------------|-------------|-------------|
| Mean depth ~ SST + MLD + Length        | 2839        | 21636        | 21689        | 2            | 0.355        | 0.35        | 0.24        |
| <b>Mean depth ~ SST + MLD</b>          | <b>2839</b> | <b>21634</b> | <b>21682</b> |              | <b>0.645</b> | <b>0.35</b> | <b>0.23</b> |
| Mean depth ~ SST + Length              | 2840        | 21672        | 21720        | 38           | 0.00         | 0.33        | 0.22        |
| Mean depth ~ MLD + Length              | 2840        | 21734        | 21781        | 100          | 0.00         | 0.06        | 0.006       |
| Mean depth ~ MLD                       | 2840        | 21659        | 21701        | 25           | 0.00         | 0.35        | 0.01        |
| Mean depth ~ Length                    | 2841        | 21694        | 21736        | 60           | 0.00         | 0.32        | 0.005       |
| Mean depth ~ SST                       | 2840        | 21671        | 21713        | 37           | 0.00         | 0.33        | 0.21        |
| Mean depth ~ 1                         | 2841        | 21693        | 21729        | 59           | 0.00         | 0.32        | 0           |
| Model                                  | DF          | AIC          | BIC          | $\Delta$ AIC | wAIC         | $R^2_c$     | $R^2_m$     |
| Prop50 ~ SST + MLD + Length            | 2839        | 7106         | 7159         | 2            | 0.336        | 0.46        | 0.33        |
| Prop50 ~ <b>SST + MLD</b>              | <b>2839</b> | 7104         | 7152         |              | 0.664        | 0.46        | 0.32        |
| Prop50 ~ SST + Length                  | 2840        | 7142         | 7189         | 38           | 0.00         | 0.45        | 0.31        |
| Prop50 ~ MLD + Length                  | 2840        | 7135         | 7183         | 31           | 0.00         | 0.65        | 0.01        |
| Prop50 ~ MLD                           | 2840        | 7134         | 7176         | 30           | 0.00         | 0.67        | 0.007       |
| Prop50 h ~ Length                      | 2841        | 7168         | 7210         | 64           | 0.00         | 0.59        | 0.005       |
| Prop50 ~ SST                           | 2840        | 7140         | 7182         | 36           | 0.00         | 0.31        | 0.46        |
| Prop50 h ~ 1                           | 2841        | 7167         | 7203         | 63           | 0.00         | 0.62        | 0           |
| Model                                  | DF          | AIC          | BIC          | $\Delta$ AIC | wAIC         | $R^2_c$     | $R^2_m$     |
| Mean cycle length ~ SST + MLD + Length | 2839        | 43767        | 43820        | 2            | 0.246        | 0.43        | 0.05        |
| <b>Mean cycle length ~ SST + MLD</b>   | <b>2839</b> | <b>43765</b> | <b>43812</b> |              | <b>0.668</b> | <b>0.43</b> | <b>0.05</b> |
| Mean cycle length ~ SST + Length       | 2840        | 43815        | 43863        | 50           | 0.00         | 0.40        | 0.03        |
| Mean cycle length ~ MLD + Length       | 2840        | 43771        | 43819        | 6            | 0.023        | 0.45        | 0.02        |
| Mean cycle length ~ MLD                | 2840        | 43769        | 43811        | 4            | 0.063        | 0.34        | 0.009       |
| Mean cycle length ~ Length             | 2841        | 43887        | 43917        | 122          | 0.00         | 0.41        | 0.005       |
| Mean cycle length ~ SST                | 2840        | 43814        | 43856        | 49           | 0.00         | 0.40        | 0.03        |
| Mean cycle length h ~ 1                | 2841        | 43818        | 43854        | 53           | 0.00         | 0.41        | 0           |

Table S3. Results from proportion time top 50 m ~ mean SST breakpoint analysis. Breakpoints were assessed for the full dataset and each individual shark. Model comparisons were made using Akaike's Information Criterion (AIC) between models with and without the breakpoint term.  $\Delta$ AIC displays deviance in AIC scores between these two models. \*Calculated breakpoint not robust.

\*\*Breakpoint term significantly improves model.

| OWT ID | Estimated breakpoint | AIC breakpoint | AIC no breakpoint ( $\Delta$ AIC) |
|--------|----------------------|----------------|-----------------------------------|
| All    | 27.8                 | 25793          | 26111 (318)**                     |
| OWT1   | 27.2                 | 1584           | 1611 (27)**                       |
| OWT2   | 28.4                 | 1279           | 1306 (27)**                       |
| OWT3   | 27.4                 | 1896           | 1940 (44)**                       |
| OWT4   | 28.1                 | 1267           | 1353 (86)**                       |
| OWT5   | 27.6                 | 2084           | 2163 (115) **                     |
| OWT6   | 28.9                 | 1219           | 1253 (34) **                      |
| OWT7*  | 26.1                 | 2390           | 2430 (40)                         |
| OWT8   | 27.5                 | 2805           | 2927 (122) **                     |
| OWT9*  | 25.2                 | 2812           | 2849 (37)                         |
| OWT10  | 28.2                 | 939            | 945 (6) **                        |
| OWT12  | 28.3                 | 1987           | 2029 (42) **                      |
| OWT14  | 28.6                 | 1370           | 1379 (9) **                       |
| OWT15  | 27.5                 | 1631           | 1683 (52) **                      |

Table S4. Results from mean cycle length ~ mean SST breakpoint analysis. Breakpoints were assessed for the full dataset and each individual shark. Model comparisons were made using Akaike's Information Criterion (AIC) between models with and without the breakpoint term.  $\Delta$ AIC displays deviance in AIC scores between these two models. \*Calculated breakpoint not robust. \*\*Breakpoint term significantly improves model.

| OWT ID | Estimated breakpoint | AIC breakpoint | AIC no breakpoint ( $\Delta$ AIC) |
|--------|----------------------|----------------|-----------------------------------|
| All    | 28.2                 | 47351          | 47457 (106)**                     |
| OWT1   | 28.6                 | 2826           | 2826 (0)                          |
| OWT2   | 28.4                 | 2416           | 2428 (12)**                       |
| OWT3   | 27.4                 | 3793           | 3806 (13)**                       |
| OWT4   | 27.5                 | 2402           | 2430 (28)**                       |
| OWT5*  | 25.6                 | 3735           | 3757 (22)                         |
| OWT6*  | 29.3                 | 2290           | 2306 (16)                         |
| OWT7   | 28                   | 4271           | 4295 (24)**                       |
| OWT8   | 27                   | 5256           | 5271 (15)**                       |
| OWT9   | 27.4                 | 5180           | 5240 (60)**                       |
| OWT10  | 28.4                 | 1724           | 1730 (6)**                        |
| OWT12  | 27.4                 | 3731           | 3744 (13)**                       |
| OWT14* | 29.3                 | 2648           | 2653 (5)                          |
| OWT15* | 26.5                 | 3099           | 3100 (1)                          |

Figure S1. The relationship between daily averaged vertical movement behaviours and SST for each individual OWT. (a) Mean daily depth; (b) percentage time in the top 50 m; (c) mean cycle length (seconds); and (d) mean amplitude.

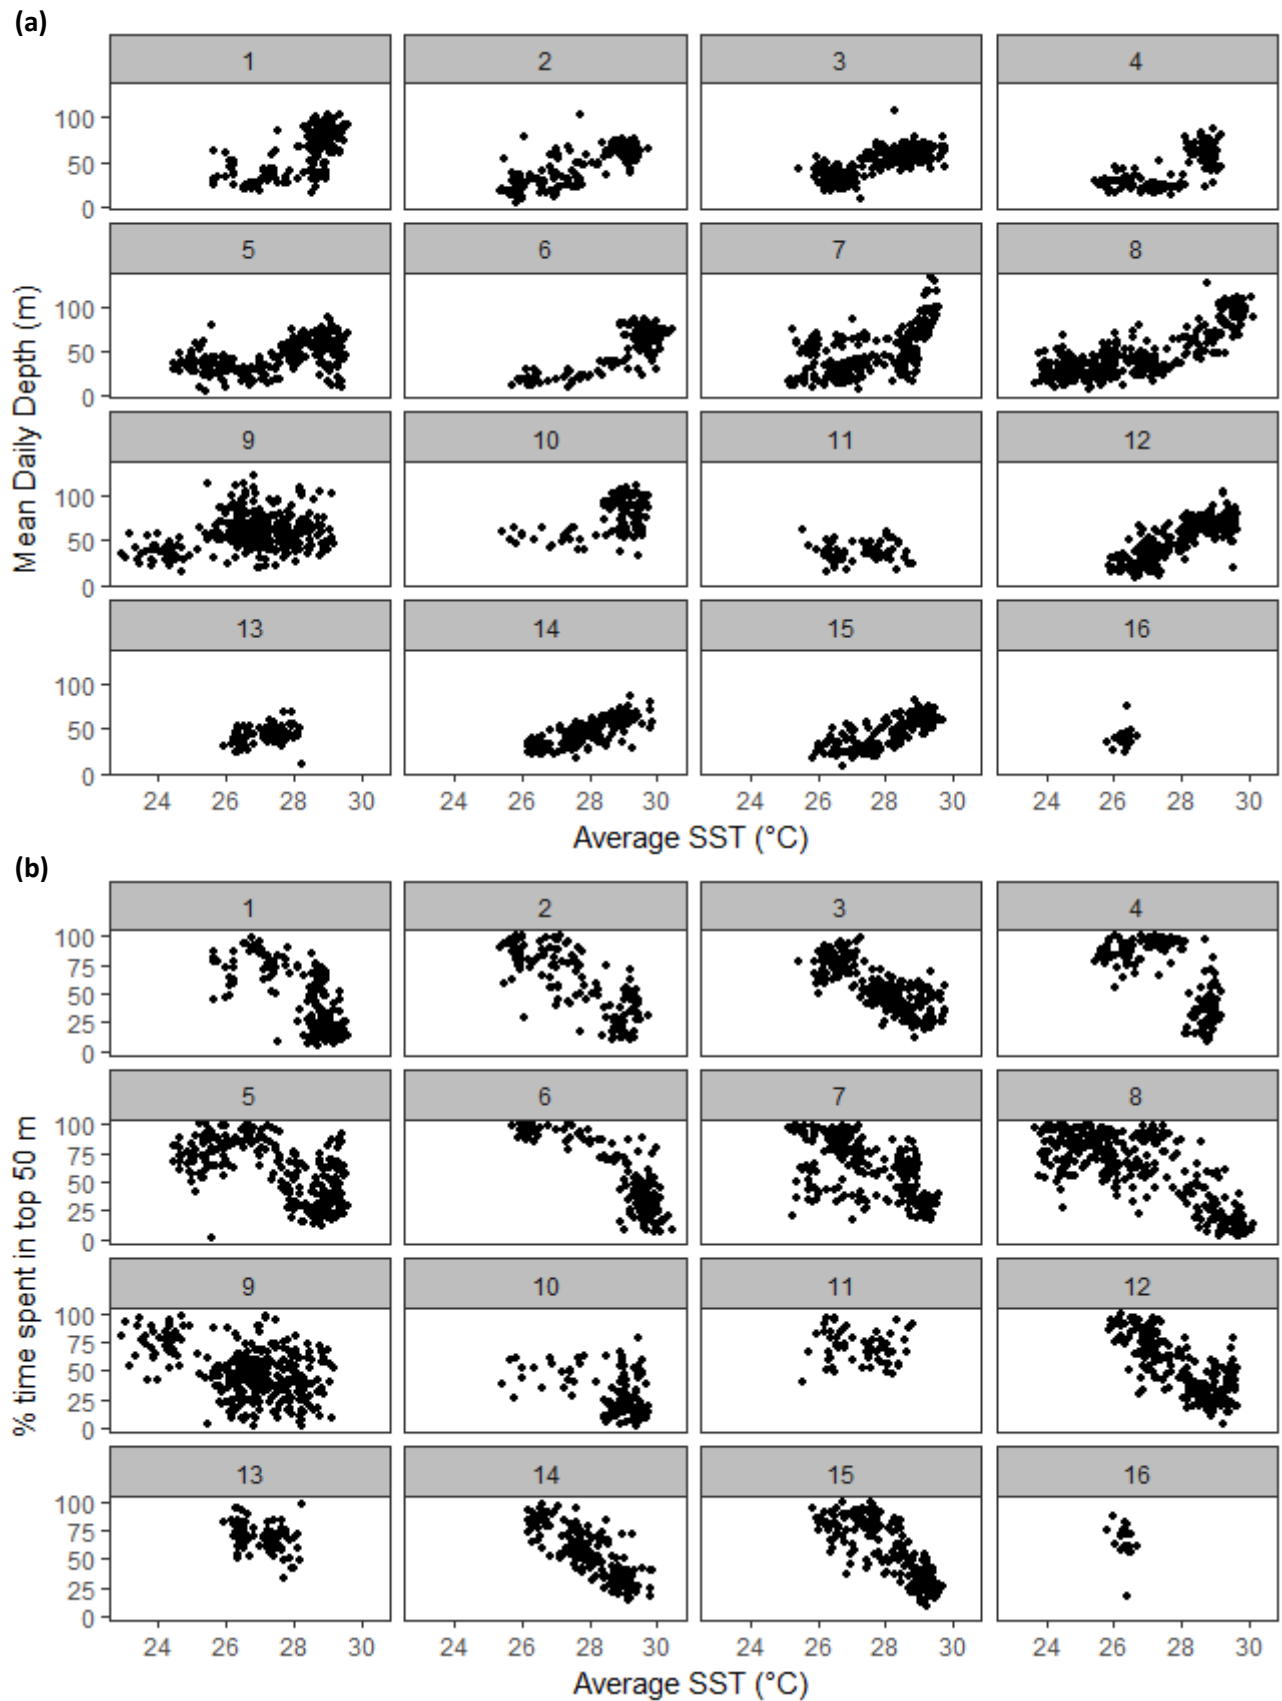

(c)

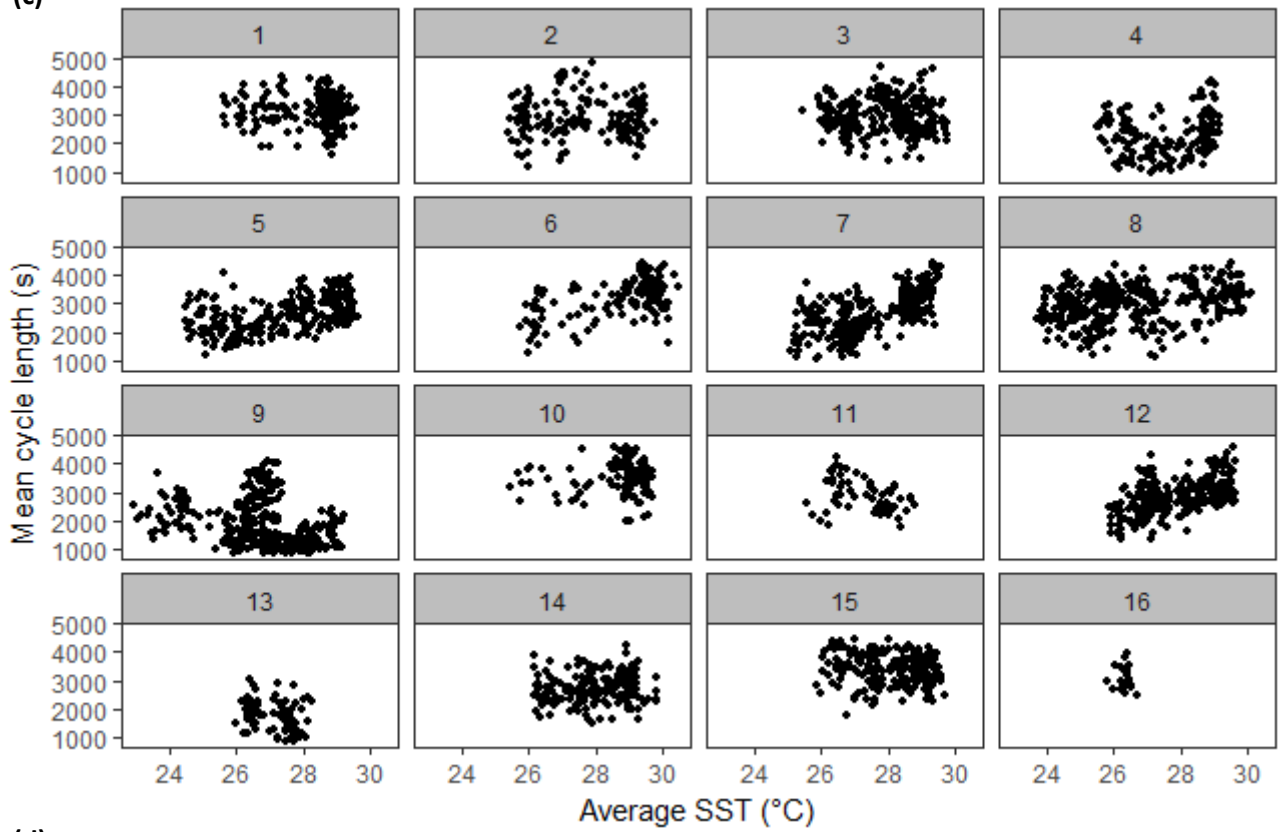

(d)

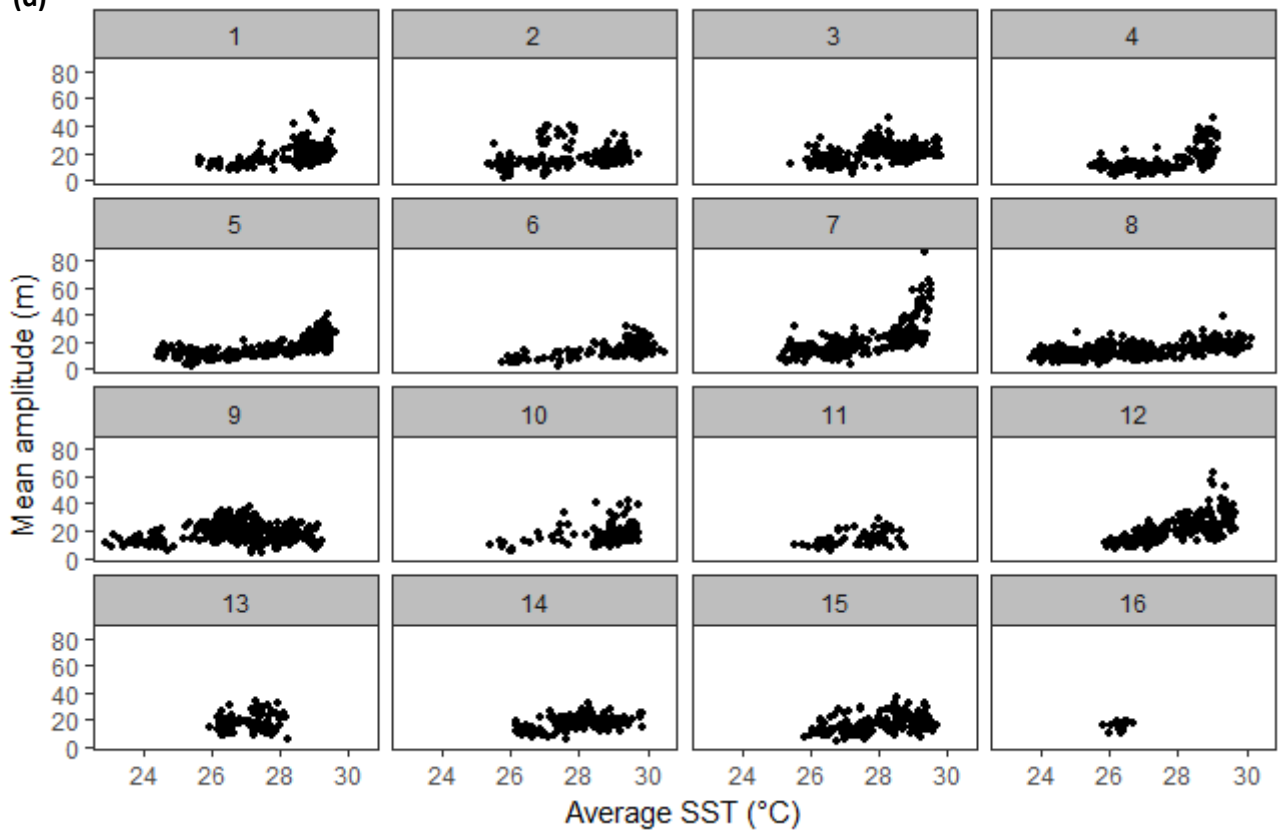

Supplement: 41598_2018_26485_MOESM1_ESM.pdf [file 41598_2018_26485_MOESM1_ESM.pdf]
